# Supplementary material
Source: PubMed Central journal article supplement (PMC8589676)
Supplement: 41380_2021_1034_MOESM8_ESM.pdf [file 41380_2021_1034_MOESM8_ESM.pdf]

**Table S7. Map2 CRISPR Primer Design and Off Targets**

| Primer       | Sequence                                                                                                                                         |
|--------------|--------------------------------------------------------------------------------------------------------------------------------------------------|
| Map2 sgRNAF  | <u>GAAATTAATACGACTCACTATAGG</u> ATGCCACGCTGGACCTGCTTGTTTTAGAGCTAGAAATAGC                                                                         |
| sgRNA common | AAAAGCACCGACTCGGTGCCACTTTTTCAAGTTGATAACGGACTAGCCTTATTTAACTTGCTAT<br>TTCTAGCTCTAAAAC                                                              |
| Cas9 Forward | <b>TATTACGACTCACTATAGG</b> GAGAATGGACTATAAGGACCACGAC                                                                                             |
| Cas9 Reverse | GCGAGCTCTAGGAATTCTTAC                                                                                                                            |
| Repair oligo | *T*G*TTTCTCTTCAACAGATTGACAGCCAAAAGTTGAACTTCAGAGAGCATGCAAAGGCCCGGG<br>TAGATCACGGGGCTGAGATCATCACACAGGAGCCAAGCAGGTCCAGCGTGGCATCACCCCGAC<br>GA*C*T*C |
| MAP2 F1      | TGAACAGGTGGGAAAGAGCT                                                                                                                             |
| MAP2 R1      | TGTCCTTGTTGCGGATGGAA                                                                                                                             |

All sequences are written in the 5' to 3' direction.

Underlined sequences mark gRNA sites.

Sequences in **bold** are T7 promoter.

Glu knockin codon sequences are marked in **red text** in repair oligo.

Phosphorothioate linkages are marked with \* in repair oligo.

**Table S7. Map2 CRISPR Primer Design and Off Targets**

| <b>Offtarget Seq</b>    | <b>Mismatch Count</b> | <b>Offtarget Score</b> | <b>Chrom</b> | <b>Locus Description</b>   |
|-------------------------|-----------------------|------------------------|--------------|----------------------------|
| ATGCCACACAGGGCCTGCTTGGG | 3                     | 0.559006211            | chr17        | intron:Kdm4b               |
| ATGCCACACTAGACCAGCTATGG | 4                     | 0.511363636            | chr18        | intergenic:Zeb1-Arhgap12   |
| GTGAGACACTGGACCTGCTTGGG | 4                     | 0.505263158            | chr14        | intergenic:Lmo7-Gm22347    |
| AGGCCTTGCTGGACCTGCTTTGG | 3                     | 0.4875                 | chr15        | intergenic:Rims2-Dcstamp   |
| CTGCCACTTTGGACCAGCTTTGG | 4                     | 0.426136364            | chr19        | intergenic:Slc22a30-Gm6425 |
| CTGCCAAGCTAGACCTGCTAAGG | 4                     | 0.361607143            | chr3         | intron:Zfhx4               |
| ATGCCACTGAGGACCTGCTTGGG | 3                     | 0.331632653            | chr16        | intergenic:Mrps6-Kcne2     |
| CTGCCCTGCTGGACCTGCTTGGG | 3                     | 0.316558442            | chr15        | intron:Cacna1i             |
| TTGCCACGCTGGAACAATTGGG  | 4                     | 0.296969697            | chr1         | intergenic:Wdr64-Exo1      |
| ATGCCACTCAGCACCTGCTTTGG | 3                     | 0.283613445            | chr7         | intergenic:Glr3-Gm25798    |
